# Supplementary material
Source: publisher figshare collection journal article supplement (https://acs.figshare.com/ndownloader/files/33166284)
Supplement: Supplementary file 1 [file 33166284]

## ***Supporting Information***

for

### **Concentration Gradient Induced Delithiation Failure of MoO<sub>3</sub> for Li-ion Batteries**

*Jihyun Jang<sup>1</sup>, Hyun-seung Kim<sup>2</sup>, San Moon<sup>3</sup>, Oh B. Chae<sup>1</sup>, Sung-Jin Ahn<sup>4</sup>, Heechul Jung<sup>5</sup>,*

*Junghyun Choi<sup>6</sup>, Seung M. Oh<sup>1</sup>, Ji Heon Ryu<sup>7\*</sup>, and Taeho Yoon<sup>8\*</sup>*

<sup>1</sup>Department of Chemical and Biological Engineering, Seoul National University, Seoul,  
08826, Republic of Korea

<sup>2</sup>Advanced Batteries Research Center, Korea Electronic Technology Institute, Seongnam,  
13509, Republic of Korea

<sup>3</sup>Energy Material Research Center, Korea Research Institute of Chemical Technology,  
Daejeon, 34114, Republic of Korea

<sup>4</sup>Samsung Advanced Institute of Technology, Suwon, 16678, Republic of Korea

<sup>5</sup>Energy and Mineral Resources Engineering, Dong-A University, Busan, 49315, Republic of  
Korea

<sup>6</sup>Energy Storage Materials Center, Energy & Environmental Division, Korea Institute of  
Ceramic Engineering & Technology, Jinju, 52852, Republic of Korea

<sup>7</sup>Graduate School of Knowledge-based Technology and Energy, Korea Polytechnic

University, Siheung, 15073, Republic of Korea

<sup>8</sup>School of Chemical Engineering, Yeungnam University, Gyeongsan, 38541, Republic of Korea

**Corresponding Author:** J. H. Ryu: ryujh@kpu.ac.kr, T. Yoon: tyoon@yu.ac.kr

## **Experimental Section**

*Material preparation:* Highly crystalline microscale MoO<sub>3</sub> powder was prepared by a solid-state synthesis reaction. Ammonium heptamolybdate tetrahydrate ((NH<sub>4</sub>)<sub>6</sub>Mo<sub>7</sub>O<sub>24</sub>•4H<sub>2</sub>O; 81–83 %, Alfa, USA) was heated at 600 °C for 10 h in air to produce MoO<sub>3</sub>. The obtained MoO<sub>3</sub> was ball-milled, using a planetary ball mill (Planetary Micro Mill PULVERISETTE 7 premium line, FRITSCH, Germany), at a low speed (300 rpm) to minimize the changes in the Mo oxidation state in MoO<sub>3</sub>. Ball milling was performed for 0 min (pristine), 5 min, 30 min, 2 h, and 4 h. Next, the pristine and 30 min ball-milled MoO<sub>3</sub> electrodes were examined by electrochemical and spectroscopic methods. In addition, nanoscale MoO<sub>3</sub> particles with diameters of hundreds of nanometers were synthesized through a solid-state reaction at 500 °C, with the same heating time and environment as the sample prepared at 600 °C.

*Electrode fabrication:* The composite electrodes were fabricated by mixing the active material, Super P (carbon black) and carboxymethyl cellulose (CMC, binder) at a weight ratio of 80:10:5. The active material and Super P were mixed with a CMC solution (1.2 wt.% in distilled water) to obtain a slurry. Then, 5 wt.% of styrene butadiene resin was added to the slurry to enhance the binding ability. Finally, the slurry was coated on a copper foil and the electrode was vacuum dried at 120 °C for 12 h.

*Electrochemical characterization:* The electrochemical performance was evaluated using a two-electrode 2032-type coin cell. The electrolyte was 1.0 M LiPF<sub>6</sub>, dissolved in a mixture of ethylene carbonate and diethyl carbonate (1:1, volume ratio). A porous polypropylene (PP) – polyethylene – PP multilayer film was used as the separator. Galvanostatic charge/discharge experiments were conducted at a current density of 100 mA g<sup>-1</sup>, over a voltage range of 0–3 V (vs. Li/Li<sup>+</sup>), in a temperature-controlled oven (25 °C). For complete charging (lithiation), a constant voltage step at 0 V (vs. Li/Li<sup>+</sup>) was added until the current density decayed to 10 mA g<sup>-1</sup>. Cycle performances were evaluated at a current density of 500 mA g<sup>-1</sup>. The GITT experiments were conducted during 10 min charge/discharge and 50 min rest with the same voltage and current conditions in the galvanostatic cycling.

*Physical analysis:* The particle size, morphology, and surface area of the ball-milled MoO<sub>3</sub> powders were examined by FE-SEM (JEOL JSM-6700F, Japan), TEM (JEOL JEM-3010, Japan), and BET method (Micromeritics analyzer, ASAP 2000, USA). The XRD patterns were obtained using Cu K<sub>α</sub> radiation (1.54056 Å) with a D8-Bruker diffractometer (Bruker, Germany), operated at 40 kV and 40 mA with continuous scanning at a rate of 5° min<sup>-1</sup>. To estimate the change in the oxidation state of MoO<sub>3</sub> after long-term ball milling, TGA (TA Instrument Q600 analyzer, USA) was performed in air or under N<sub>2</sub> environments, with a heating rate of 10 °C min<sup>-1</sup>. The change in the Mo valency during the charging/discharging was examined via the Mo K-edge XANES spectra, obtained at the 7D XAFS beamline at the Pohang Light Source, with a ring current of 120–170 mA at 2.5 GeV. The energy of the Mo absorption edge was calibrated using the spectrum of a thin film of Mo metal as the reference. XPS (Sigma probe, USA) was conducted via Al-K<sub>α</sub> (1486.6 eV) X-ray radiation produced at a constant power of 100 W (15 kV and 6.67 mA) with a spot radius of 200 μm and the pass energy for the detector of 30 eV.

*Computational simulation:* The governing equation, initial and boundary conditions, and parameters are presented in Table S1. The differential equation was solved using a numerical solver embedded in the software, MATLAB R2020b.

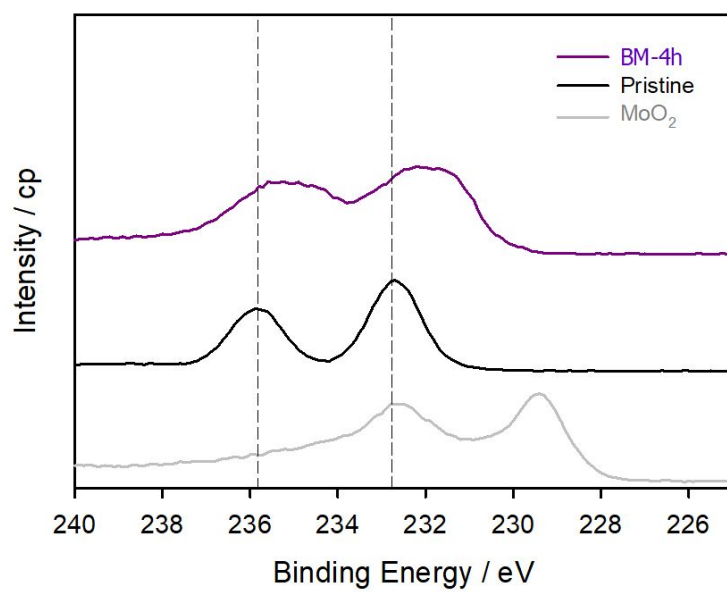

**Figure S1.** Mo 3d XPS spectra of MoO<sub>2</sub>, pristine (MoO<sub>3</sub>), and BM-4h samples.

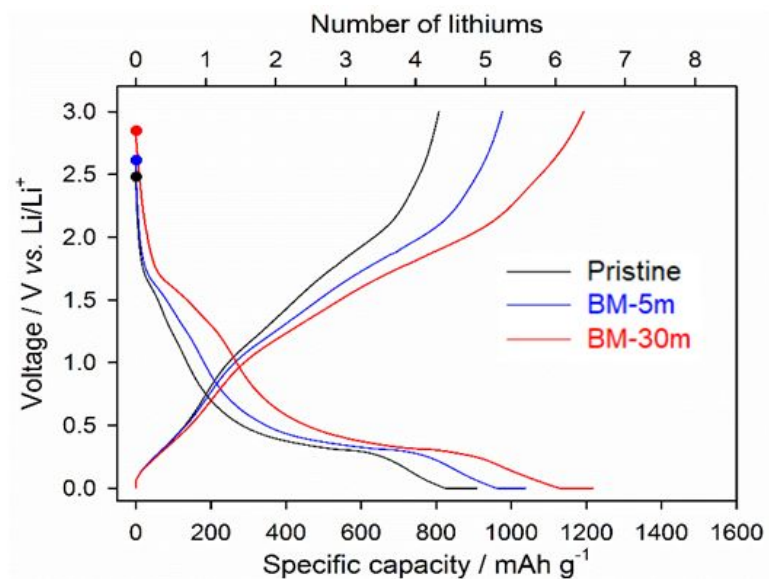

**Figure S2.** Second-cycle galvanostatic voltage profiles of pristine, BM-5m, and BM-30m electrodes. The circles indicate the initial voltages for the second cycle (2.48 V, 2.61 V and 2.85 V (vs.  $\text{Li/Li}^+$ ), for pristine, BM-5m, and BM-30m, respectively).

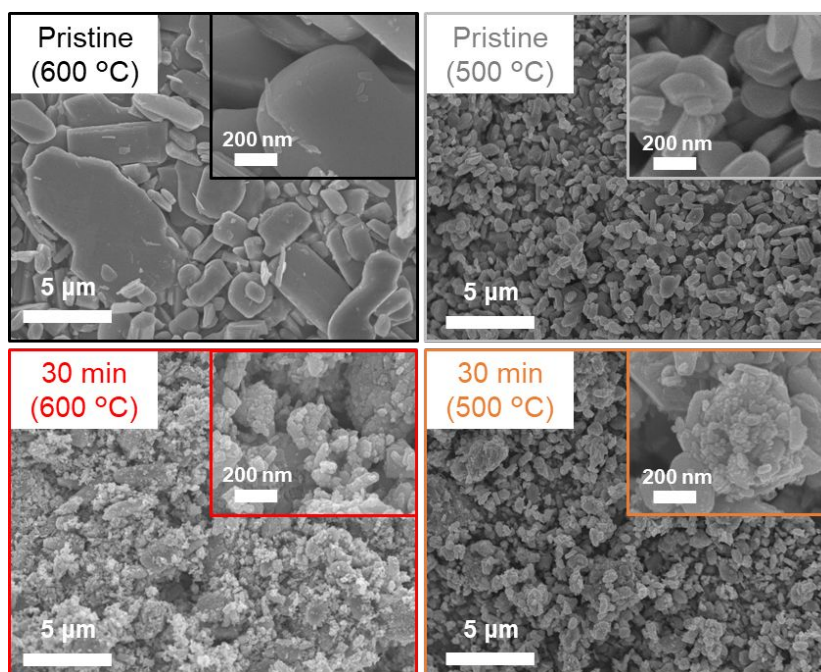

**Figure S3.** FE-SEM images of the pristine and 30 min ball-milled MoO<sub>3</sub> powders, synthesized at 600 °C and 500 °C.

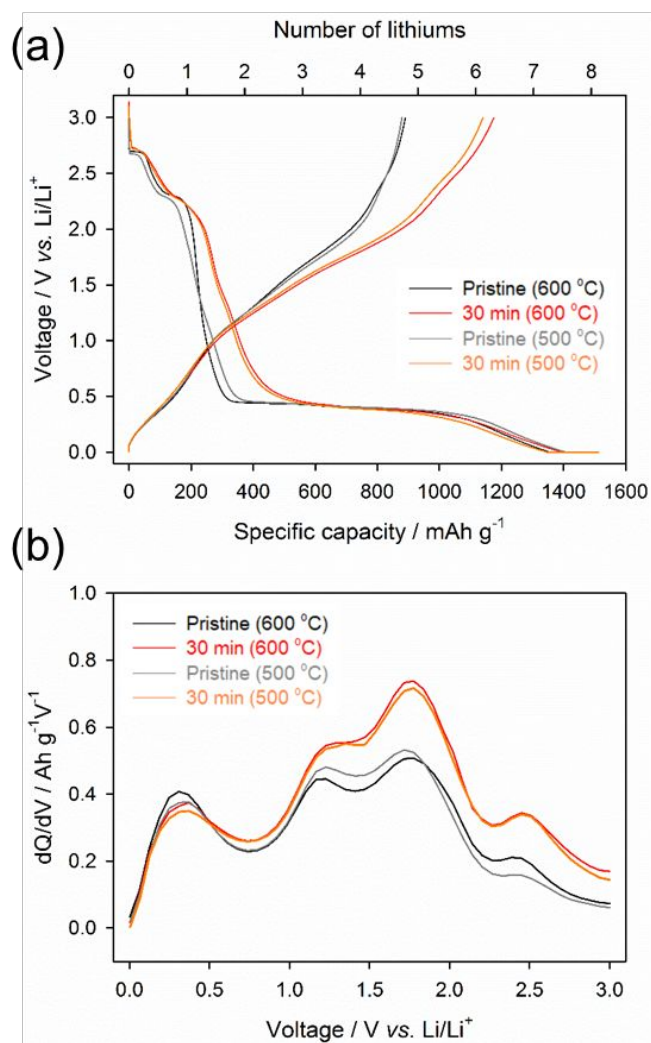

**Figure S4.** (a) First-cycle galvanostatic voltage profiles and (b) delithiation dQ/dV plots of the pristine and 30 min ball-milled MoO<sub>3</sub> electrodes, synthesized at 600 °C and 500 °C.



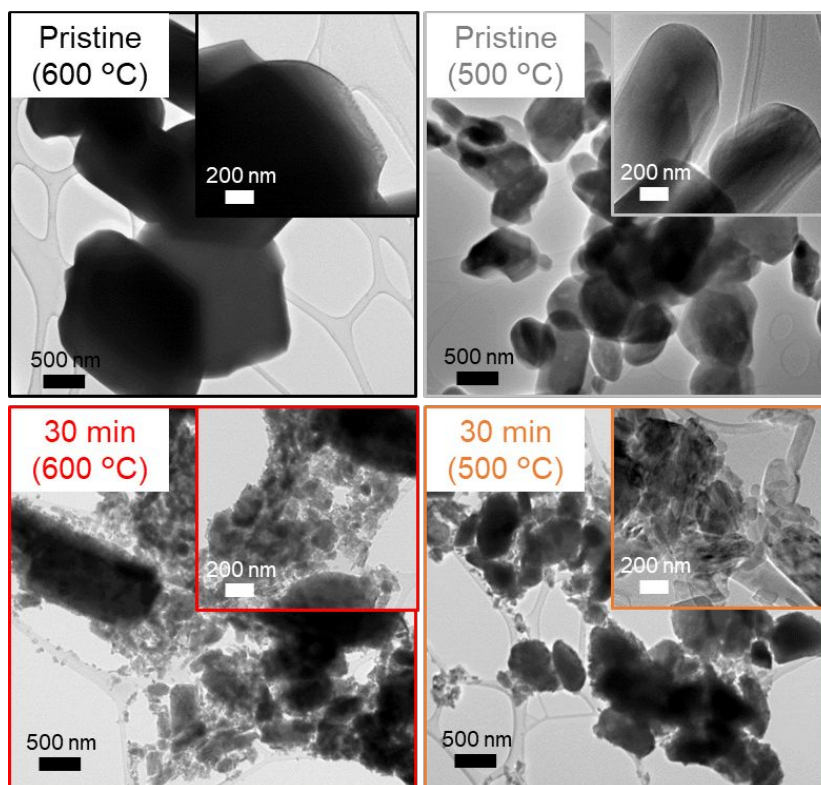

**Figure S5.** TEM images of the pristine and 30 min ball-milled  $\text{MoO}_3$  powders, synthesized at 600 °C and 500 °C.

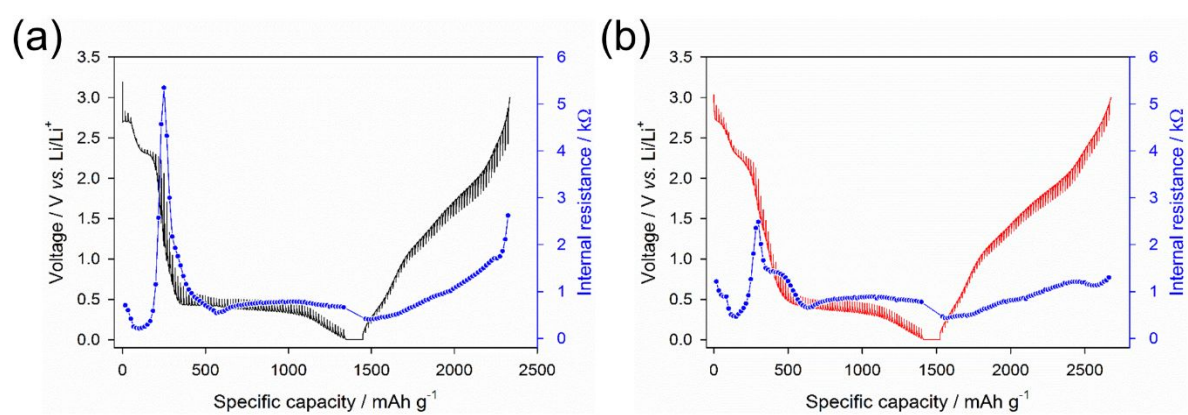

**Figure S6.** The GITT of (a) pristine  $\text{MoO}_3$  and (b) BM-30m samples during the first cycle.

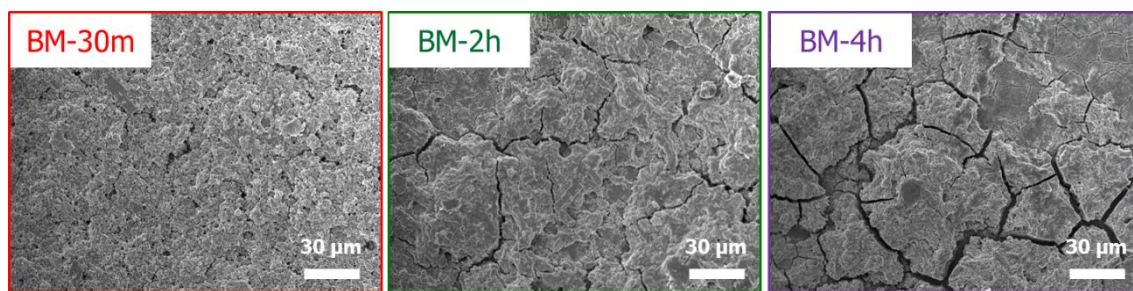

**Figure S7.** Low magnification FE-SEM images of the BM-30m, BM-2h, and BM-4h electrodes. Notably, there are severe cracks in the BM-2h and BM-4h electrodes, which were formed due to the water solubility of  $\text{MoO}_{3-x}$ .

**Table S1.** The governing equation, initial and boundary conditions, and parameters used to simulate the concentration gradient of lithium ion in MoO<sub>3</sub> particles.

|                          | Mass balance equation<br>Initial & Boundary conditions<br>Parameters                                                                                    |
|--------------------------|---------------------------------------------------------------------------------------------------------------------------------------------------------|
| Mass balance             | $\frac{\partial C}{\partial t} = D \nabla^2 C$                                                                                                          |
| Initial condition        | $C(0, r) = C_0 \text{ at } t = 0$                                                                                                                       |
| Boundary condition       | $\frac{\partial C}{\partial r} = 0 \text{ at } r = 0$<br>$D \frac{\partial C}{\partial r} = - \frac{I \cdot V \cdot \rho}{F \cdot A} \text{ at } r = R$ |
| Diffusion coefficient    | $D = 1.5 \times 10^{-17} \text{ m}^2 \text{ s}^{-1}$                                                                                                    |
| Initial concentration    | $C_0 = 0.1117 \text{ mol cm}^{-3}$                                                                                                                      |
| Current density          | $I = 100 \text{ mA g}^{-1}$                                                                                                                             |
| Particle volume and area | $V = \frac{4}{3}\pi R^3, \quad A = 4\pi R^2$                                                                                                            |
| Radius                   | $R = 10 \text{ nm (or } 1 \mu\text{m)}$                                                                                                                 |
| Density                  | $\rho = 4.69 \text{ g cm}^{-3}$                                                                                                                         |
| Faraday constant         | $F = 96485 \text{ C mol}^{-1}$                                                                                                                          |

**Table S2.** First-cycle lithiation, delithiation, and the Coulombic efficiency of pristine MoO<sub>3</sub>, BM-5m, BM-30m, BM-2h, and BM-4h electrodes.

| First cycle | Lithiation capacity (mAh g <sup>-1</sup> ) | Delithiation capacity (mAh g <sup>-1</sup> ) | Coulombic efficiency (%) |
|-------------|--------------------------------------------|----------------------------------------------|--------------------------|
| Pristine    | 1465                                       | 890                                          | 60.8                     |
| BM-5m       | 1454                                       | 1010                                         | 69.5                     |
| BM-30m      | 1503                                       | 1176                                         | 78.2                     |
| BM-2h       | 1442                                       | 1057                                         | 73.3                     |
| BM-4h       | 1463                                       | 648                                          | 44.3                     |

**Table S3.** Initial Coulombic efficiency of 30 min ball-milled MoO<sub>3</sub> electrodes with various ball-milling conditions: speed and ball-to-powder ratios.

| Initial Coulombic efficiency (%) |        | Ball-milling speed (rpm) |      |      |      |
|----------------------------------|--------|--------------------------|------|------|------|
|                                  |        | 100                      | 200  | 300  | 400  |
| Ball to powder ratio             | Bare   | 60.8                     |      |      |      |
|                                  | 5 : 1  | -                        | -    | 62.1 | -    |
|                                  | 10 : 1 | 60.8                     | 63.6 | 70.6 | 76.1 |
|                                  | 20 : 1 | 62.0                     | 74.4 | 78.2 | 78.0 |
|                                  | 40 : 1 | -                        | 75.0 | 75.5 | -    |
